# Supplementary material for: Importance of device structure and interlayer design in storage stability of naphthalene diimide-based all-polymer solar cells
Source: Royal Society of Chemistry journal article supplement (doi:10.1039/c9ta14032h), 2020-01-01
Supplement: c9ta14032h1.pdf [file c9ta14032h1.pdf]

## Supporting Information for

# **Importance of Device Structure and Interlayer Design in Storage Stability of Naphthalene Diimide-based All-Polymer Solar Cells**

*Changyeon Lee<sup>a,\*</sup>, Junbok Lee<sup>a</sup>, Seungjin Lee<sup>a</sup>, Wonho Lee<sup>b</sup>, Hoseon You<sup>a</sup>, Han Young Woo<sup>c</sup>  
and Bumjoon J. Kim<sup>†,\*</sup>*

<sup>a</sup>Department of Chemical and Biomolecular Engineering, Korea Advanced Institute of Science and Technology (KAIST), Daejeon 34141, Republic of Korea

<sup>b</sup>Department of Polymer Science and Engineering, Kumoh National Institute of Technology, Gumi, Gyeongbuk 39177, Republic of Korea

<sup>c</sup>Department of Chemistry, Korea University, Seoul 02841, Republic of Korea

**Keywords:** all-polymer solar cells, stability, burn-in degradation, storage lifetime, naphthalene diimide polymers, interlayers

\*Electronic mail: [bumjoonkim@kaist.ac.kr](mailto:bumjoonkim@kaist.ac.kr), [changyeon@kaist.ac.kr](mailto:changyeon@kaist.ac.kr)

## Table of Contents

### Supplementary Fig. S1-5

- **Fig. S1:** Storage stability of various all-PSC systems.
- **Fig. S2:** Morphology of all-PSCs after 24-hours storage.
- **Fig. S3:** Polymer packing structure of all-PSCs after 24-hours storage.
- **Fig. S4:** Device testing for checking morphological stability.
- **Fig. S5:** Comparison on the storage stability of BHJ and bilayer all-PSCs.

### Supplementary Table S1-2

- **Table S1:** Performances of BHJ and bilayer all-PSCs as a function of storage.
- **Table S2:** Long-term storage stability of all-PSCs.

## Storage stability of various all-PSC systems

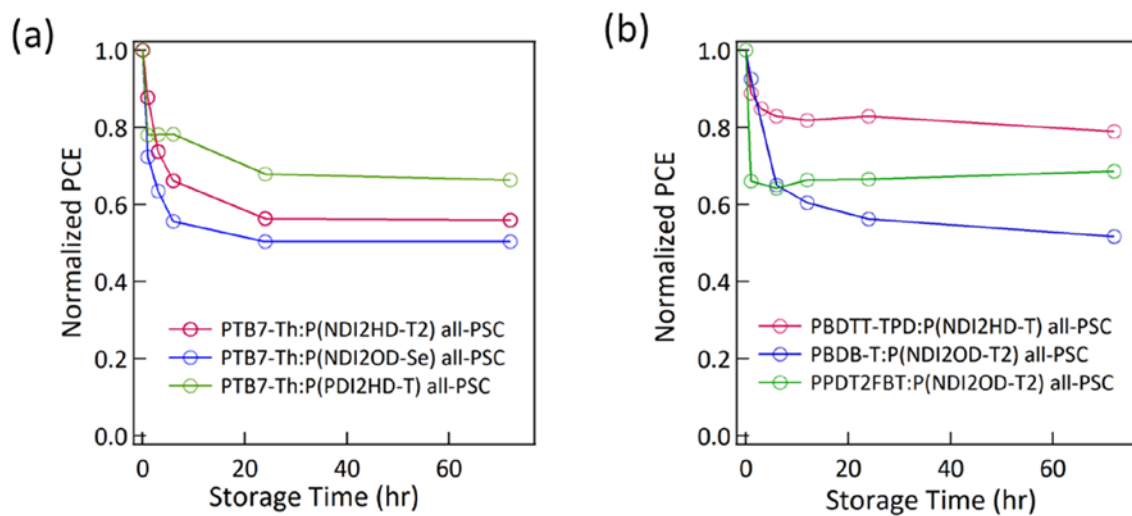

**Fig. S1.** (a) Storage lifetimes of PTB7-Th-based all-PSCs with different  $P_{AS}$ , P(NDI2HD-T2), P(NDI2HD-Se) and P(PDI2HD-T). (b) Storage lifetimes of NDI-based all-PSCs with different  $P_{DS}$ , PBDTT-TPD, PBDB-T and PPDT2FBT.

## Morphological change of all-PSCs after 24-hours storage

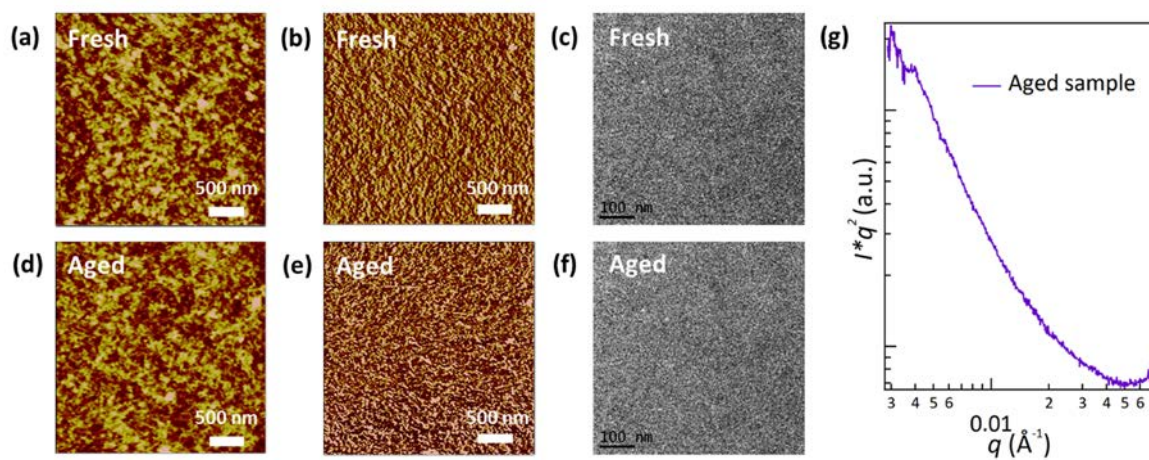

**Fig. S2.** AFM height and phase images of (a, b) fresh and (d, e) aged all-PSCs. TEM images of (c) fresh and (f) aged all-PSCs. (g) RSoXS profile of aged all-PSCs.

**Polymer packing structure of all-PSCs after 24-hours storage**

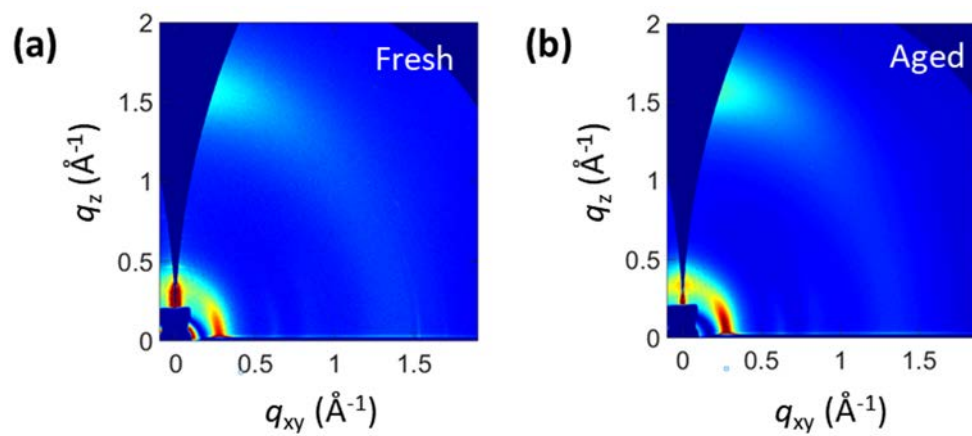

**Fig. S3.** 2D GIXS patterns of (a) fresh and (b) aged PTB7-Th:P(NDI2HD-T) all-PSCs.

## Device testing for checking morphological stability

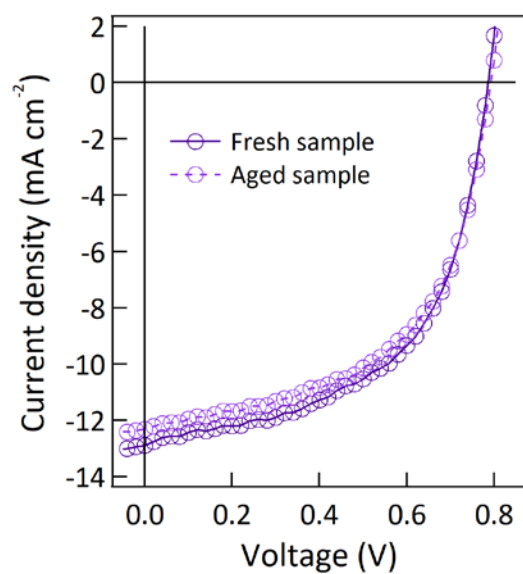

**Fig. S4.** *J-V* curves of all-PSCs, where the Ag electrodes were deposited directly (fresh) or after 3 days (aged) from the active layer formation.

## Comparison on the storage stability of BHJ and bilayer all-PSCs

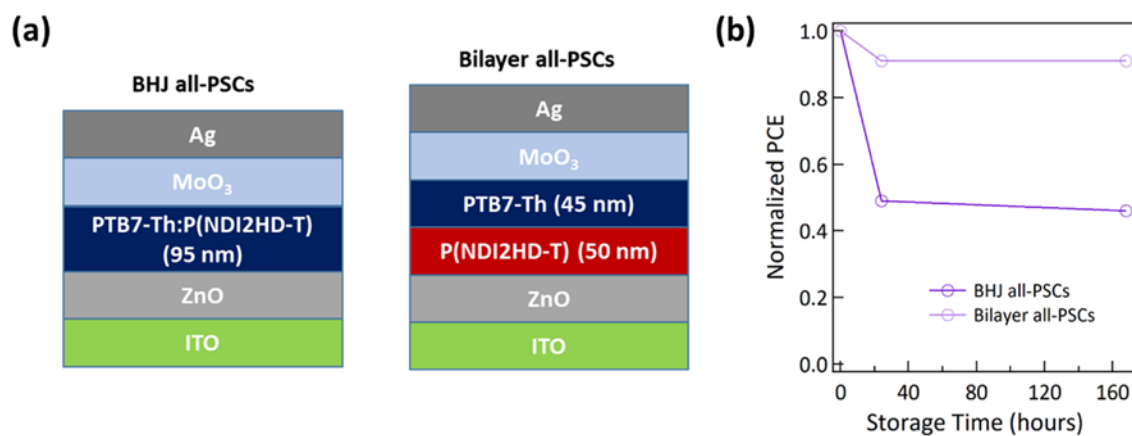

**Fig. S5.** Storage stability of BHJ and bilayer all-PSCs. To fabricate bilayer all-PSCs, PTB7-Th was floated onto water and transferred onto P(NDI2HD-T) layer.

**Table S1.** Photovoltaic parameters of BHJ and bilayer all-PSCs as a function of storage.

| Devices          | Storage (hr) | $V_{oc}$ (V) | $J_{sc}$ (mA/cm <sup>2</sup> ) | FF   | PCE (%) |
|------------------|--------------|--------------|--------------------------------|------|---------|
| BHJ all-PSCs     | 0            | 0.79         | 12.12                          | 0.58 | 5.55    |
|                  | 24           | 0.77         | 6.93                           | 0.51 | 2.72    |
|                  | 168          | 0.76         | 6.98                           | 0.48 | 2.55    |
| Bilayer all-PSCs | 0            | 0.80         | 1.26                           | 0.66 | 0.66    |
|                  | 24           | 0.80         | 1.20                           | 0.63 | 0.60    |
|                  | 168          | 0.80         | 1.18                           | 0.63 | 0.60    |

## Long-term storage stability of all-PSCs

**Table 1.** Photovoltaic parameters of all-PSCs as a function of storage time.

| Inverted-type all-PSCs with a PEDOT:PSS passivation layer   |                 |                                   |      |            |
|-------------------------------------------------------------|-----------------|-----------------------------------|------|------------|
| PTB7-Th:P(NDI2HD-T)                                         | $V_{oc}$<br>(V) | $J_{sc}$<br>(mA/cm <sup>2</sup> ) | FF   | PCE<br>(%) |
| 0 hr                                                        | 0.79            | 11.65                             | 0.56 | 5.15       |
| 24 hr                                                       | 0.78            | 11.35                             | 0.54 | 4.78       |
| 168 hr                                                      | 0.77            | 11.06                             | 0.52 | 4.43       |
| 336 hr                                                      | 0.77            | 10.80                             | 0.51 | 4.24       |
| 1080 hr                                                     | 0.76            | 11.02                             | 0.50 | 4.15       |
| PBDTT-TPD:P(NDI2HD-T)                                       | $V_{oc}$<br>(V) | $J_{sc}$<br>(mA/cm <sup>2</sup> ) | FF   | PCE<br>(%) |
| 0 hr                                                        | 1.03            | 10.01                             | 0.57 | 5.88       |
| 24 hr                                                       | 1.01            | 10.05                             | 0.55 | 5.58       |
| 168 hr                                                      | 0.99            | 10.26                             | 0.54 | 5.48       |
| 336 hr                                                      | 0.99            | 10.10                             | 0.54 | 5.40       |
| 1080 hr                                                     | 0.99            | 10.19                             | 0.53 | 5.35       |
| Normal-type all-PSCs with a PNDIT-F3N-Br polymer interlayer |                 |                                   |      |            |
| PTB7-Th:P(NDI2HD-T)                                         | $V_{oc}$<br>(V) | $J_{sc}$<br>(mA/cm <sup>2</sup> ) | FF   | PCE<br>(%) |
| 0 hr                                                        | 0.78            | 13.54                             | 0.49 | 5.17       |
| 24 hr                                                       | 0.78            | 13.05                             | 0.48 | 4.89       |
| 168 hr                                                      | 0.77            | 13.01                             | 0.48 | 4.81       |
| 336 hr                                                      | 0.77            | 13.72                             | 0.46 | 4.86       |
| 1080 hr                                                     | 0.76            | 13.33                             | 0.45 | 4.52       |
| PBDTT-TPD:P(NDI2HD-T)                                       | $V_{oc}$<br>(V) | $J_{sc}$<br>(mA/cm <sup>2</sup> ) | FF   | PCE<br>(%) |
| 0 hr                                                        | 1.07            | 10.69                             | 0.65 | 7.42       |
| 24 hr                                                       | 1.07            | 10.53                             | 0.62 | 6.94       |
| 168 hr                                                      | 1.06            | 10.42                             | 0.62 | 6.85       |
| 336 hr                                                      | 1.06            | 10.29                             | 0.61 | 6.65       |
| 1080 hr                                                     | 1.06            | 10.27                             | 0.59 | 6.47       |
